# Supplementary material for: Association of Angiopoietin-2 and Ki-67 Expression with Vascular Density and Sunitinib Response in Metastatic Renal Cell Carcinoma
Source: PubMed Central journal article supplement (PMC4839598; doi:10.1371/journal.pone.0153745), 2016-04-21
Supplement: pone.0153745.s001.pdf [file pone.0153745.s001.pdf]

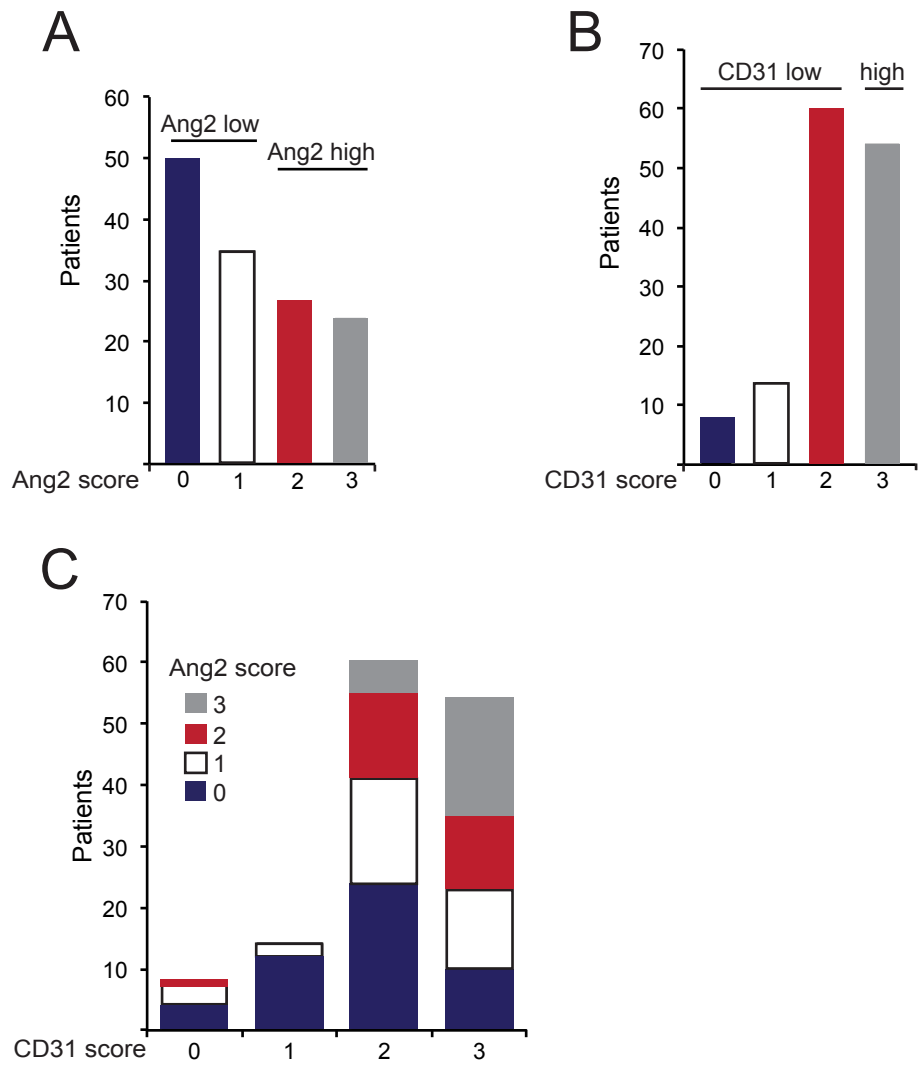

S1 Fig. Distribution of patients according to Ang2 and CD31 expression scores.
