# Supplementary material for: Association of Angiopoietin-2 and Ki-67 Expression with Vascular Density and Sunitinib Response in Metastatic Renal Cell Carcinoma
Source: PubMed Central journal article supplement (PMC4839598; doi:10.1371/journal.pone.0153745), 2016-04-21
Supplement: pone.0153745.s003.pdf [file pone.0153745.s003.pdf]

**Supporting Information for the manuscript**

**Association of Angiopoietin-2 and Ki-67 expression with  
vascular density and sunitinib response in metastatic renal  
cell carcinoma**

Juhana Rautiola<sup>1¶</sup>, Anita Lampinen<sup>2¶</sup>, Tuomas Mirtti<sup>4,5</sup>, Ari Ristimäki<sup>5</sup>, Heikki  
Joensuu<sup>1</sup>, Petri Bono<sup>1</sup> and Pipsa Saharinen<sup>2,3\*</sup>

<sup>1</sup>Comprehensive Cancer Center, Helsinki University Hospital, P.O.B. 180, 00029  
HUS, Finland and University of Helsinki, Finland

<sup>2</sup>Translational Cancer Biology Program, Research Programs Unit, and Department of  
Virology, Haartman Institute, Biomedicum Helsinki, Haartmaninkatu 8, P.O.B. 63,  
FI-00014 University of Helsinki, Finland

<sup>3</sup>Wihuri Research Institute, Biomedicum Helsinki, Haartmaninkatu 8, FI-00290  
Helsinki, Finland

<sup>4</sup>Institute for Molecular Medicine Finland, Haartmaninkatu 8, P.O.B. 63, FI-00014  
University of Helsinki, Finland

<sup>5</sup>Pathology, Research Programs Unit and HUSLAB, University of Helsinki and  
Helsinki University Hospital, P.O.B. 400, FI-00029 HUS, Helsinki, Finland

**\*Corresponding author:** Pipsa Saharinen, E-mail: Pipsa.Saharinen@Helsinki.fi

<sup>¶</sup>These authors contributed equally.

## Supporting Information

Non-parametric Spearman rank order correlation test was used to analyse the correlation between Ang2 and CD31 expression scores (Ang2 scores 0-3, CD31 scores 0-3, from negative (0) to high (3) expression) and the response scores (response scores 1-3, PR=1, SD=2, PD=3) using the R-package. All statistical tests were two-sided. Linear fitted surface modeling [1] and smoothed linear least-squares surface fitting [2] were adopted to visualize the correlation of the Ang2, CD31 and Ki-67 expression and sunitib response scores using the scatter 3D function in the car package of the R program.

## References

1. Fox J and Weisberg S. An {R} Companion to Applied Regression, Second Edition. Thousand Oaks CA: Sage. (2011) URL: <http://socserv.socsci.mcmaster.ca/jfox/Books/Companion>.
2. R Core Team (2015). R: A language and environment for statistical computing. R Foundation for Statistical Computing, Vienna, Austria. URL <http://www.R-project.org/>).
