# Supplementary material for: Association of Angiopoietin-2 and Ki-67 Expression with Vascular Density and Sunitinib Response in Metastatic Renal Cell Carcinoma
Source: PubMed Central journal article supplement (PMC4839598; doi:10.1371/journal.pone.0153745), 2016-04-21
Supplement: pone.0153745.s004.pdf [file pone.0153745.s004.pdf]

|           | CD31 high | CD31 low |
|-----------|-----------|----------|
| Ang2 high | 31        | 20       |
| Ang2 low  | 23        | 62       |

**S1 Table.** Distribution of patients according to tumour Ang2 and CD31 expression scores in the Ang2 and CD31 high and low categories.
