# Supplementary material for: Association of Angiopoietin-2 and Ki-67 Expression with Vascular Density and Sunitinib Response in Metastatic Renal Cell Carcinoma
Source: PubMed Central journal article supplement (PMC4839598; doi:10.1371/journal.pone.0153745), 2016-04-21
Supplement: pone.0153745.s005.pdf [file pone.0153745.s005.pdf]

|              | All patients | Ang2 high | Ang2 low | <i>P</i> | CD31 high | CD31 low | <i>P</i> |
|--------------|--------------|-----------|----------|----------|-----------|----------|----------|
| PR (%)       | 37           | 17        | 20       | 0.196    | 16        | 21       | 0.518    |
| SD+PD (%)    | 89           | 30        | 59       |          | 33        | 56       |          |
| PFS (months) | 8.7          | 11.1      | 8.2      | 0.308    | 8.7       | 8.6      | 0.851    |
| OS (months)  | 22.6         | 22.3      | 22.6     | 0.274    | 22.3      | 22.6     | 0.949    |

**S2 Table.** Associations between renal cell cancer Ang2 and CD31 expression and objective response rate, progression-free survival (PFS) and overall survival (OS).
